# Supplementary material for: Implementing a Community Model of Mental Health Care in Chile: Impact on Psychiatric Emergency Visits
Source: Atypon-hosted journal article supplement (doi:10.1176/appi.ps.201600371), 2017-05-01
Supplement: appi.ps.201600371.ds001.pdf [file appi.ps.201600371.ds001.pdf]

**Supplementary Table 1. Synthesis of information used in the regression models, by district and municipality**

| District | PEV <sup>1</sup> | Population | Year |  |  |  |
|----------|------------------|------------|------|--|--|--|
| D1       | 3975             | 758394     | 2006 |  |  |  |
| D1       | 3615             | 874261     | 2011 |  |  |  |
| D2       | 880              | 849501     | 2006 |  |  |  |
| D2       | 1227             | 943969     | 2011 |  |  |  |

  

| Municipality | Year | Population | PEV | CMMHC <sup>2</sup> | Distance (mt) <sup>3</sup> |
|--------------|------|------------|-----|--------------------|----------------------------|
| M1           | 2006 | 71516      | 592 | 1                  | 2822                       |
| M1           | 2011 | 102943     | 504 | 1                  | 2822                       |
| M2           | 2006 | 46688      | 621 | 1                  | 860                        |
| M2           | 2011 | 55615      | 570 | 1                  | 860                        |
| M3           | 2006 | 68778      | 683 | 1                  | 2720                       |
| M3           | 2011 | 79387      | 572 | 1                  | 2720                       |
| M4           | 2006 | 92888      | 550 | 0                  | 5576                       |
| M4           | 2011 | 91929      | 411 | 1                  | 5576                       |
| M5           | 2006 | 55822      | 412 | 1                  | 5318                       |
| M5           | 2011 | 57961      | 387 | 1                  | 5318                       |
| M6           | 2006 | 192686     | 533 | 0                  | 15782                      |
| M6           | 2011 | 210422     | 571 | 1                  | 15782                      |
| M7           | 2006 | 136608     | 389 | 1                  | 9315                       |
| M7           | 2011 | 150906     | 418 | 1                  | 9315                       |
| M8           | 2006 | 13687      | 38  | 0                  | 19610                      |
| M8           | 2011 | 15996      | 32  | 0                  | 19610                      |
| M9           | 2006 | 41624      | 90  | 0                  | 29245                      |
| M9           | 2011 | 60499      | 97  | 0                  | 29245                      |
| M10          | 2006 | 38097      | 67  | 0                  | 37455                      |
| M10          | 2011 | 48603      | 53  | 0                  | 37455                      |

1. *Psychiatric Emergency Visits (n)*
2. *Prevalence of Communitary Model of Mental Health Care, 1=yes  
0=no*
3. *Distance to the psychiatric emergency room, meters*

**Supplementary Table 2. Socio-demographic descriptors by studied municipality.**  
**Source: analysis from socio-demographic survey CASEN 2009<sup>1</sup>**

| Municipality    | Mean household income per capita <sup>2</sup> | % of population under poverty line <sup>3</sup> | % less than 8 years of education | % unemployment rate |
|-----------------|-----------------------------------------------|-------------------------------------------------|----------------------------------|---------------------|
| M1              | 239                                           | 18.0%                                           | 23.7%                            | 8.1%                |
| M2              | 449                                           | 7.2%                                            | 9.7%                             | 5.7%                |
| M3              | 256                                           | 20.3%                                           | 23.9%                            | 5.0%                |
| M4              | 237                                           | 23.5%                                           | 25.4%                            | 7.3%                |
| M5              | 337                                           | 16.8%                                           | 12.2%                            | 5.9%                |
| M6              | 225                                           | 19.1%                                           | 18.7%                            | 5.1%                |
| M7              | 242                                           | 18.3%                                           | 20.0%                            | 8.9%                |
| M8              | 245                                           | 18.3%                                           | 27.4%                            | 6.0%                |
| M9              | 239                                           | 15.1%                                           | 19.9%                            | 3.8%                |
| M10             | 199                                           | 22.3%                                           | 31.1%                            | 5.4%                |
| Country minimum | 90.1                                          | 1.0%                                            | 2.1%                             | 0%                  |
| Country maximum | 1448.5                                        | 57.0%                                           | 80.4%                            | 11.2%               |

1. [www.observatorio.ministeriodesarrollosocial.gob.cl/casen/casen\\_usuarios.php](http://www.observatorio.ministeriodesarrollosocial.gob.cl/casen/casen_usuarios.php)
2. In international dollars (purchase power parity, PPP). Calculated with data from the World Bank and Central Bank of Chile. Price level ratio of PPP conversion factor (GDP) to market exchange rate. 2015. World Bank. November 08, 2016. Central Bank Chile; Daily indicators. *Indicadores Diarios*. 2016. Central Bank of Chile. November 08, 2016
3. Basket of commodities. Line of poverty 2009 under 58,02 International dollars
